# Supplementary material for: Modeling Response Time Variation in Addition Tasks: An ACT-R Extension with EVC-Guided Pause States
Source: Research Square preprint supplement (doi:10.21203/rs.3.rs-7804364/v1), 2025-11-06

**Supplemental Material** **for**

**"Study of the ACT-R Model to Reproduce the Variation in Response Time for Addition Tasks derived from Experiments"**

**Preamble**

This document provides supplementary figures for the main manuscript. The main text of the paper presents experimental results from a representative participant (Participant 1). For the model performance comparisons against experimental data, the results for Set 3 of Participant 1 are shown as the representative case. To demonstrate the robustness and consistency of our findings, this supplemental material contains the model comparison figures for the remaining sets of Participant 1 (Sets 4 and 5), in addition to the full set of experimental and model comparison figures for all other analyzed participants (Participants 2, 3, and 4).

**Participant 1: Additional Results**

**A. Proposed Model Performance vs. Experimental Data (corresponding to Section 5.2)**

- Figure S1. Comparison of proposed model simulations and experimental data for Participant 1 (Set 4).


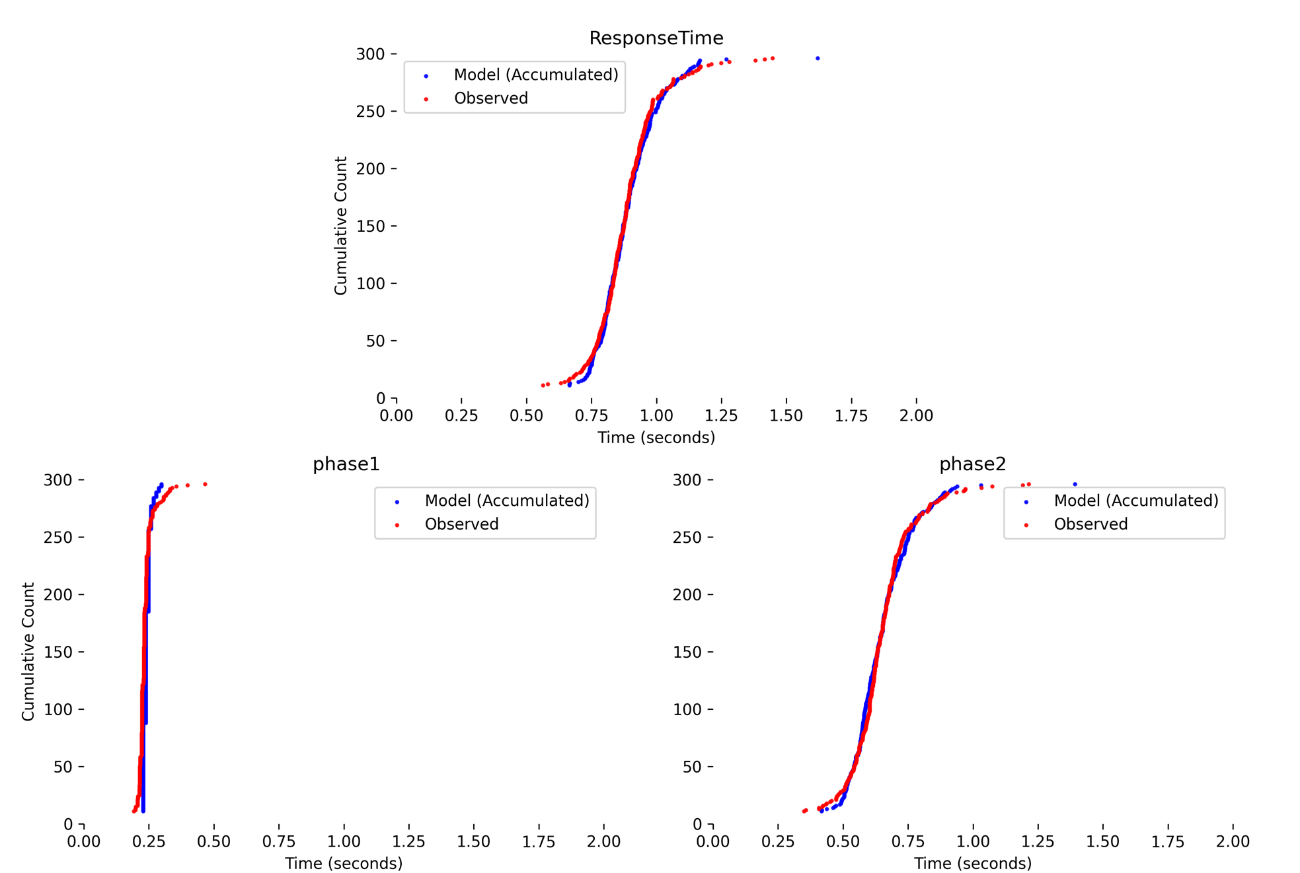


- Figure S2. Comparison of proposed model simulations and experimental data for Participant 1 (Set 5).


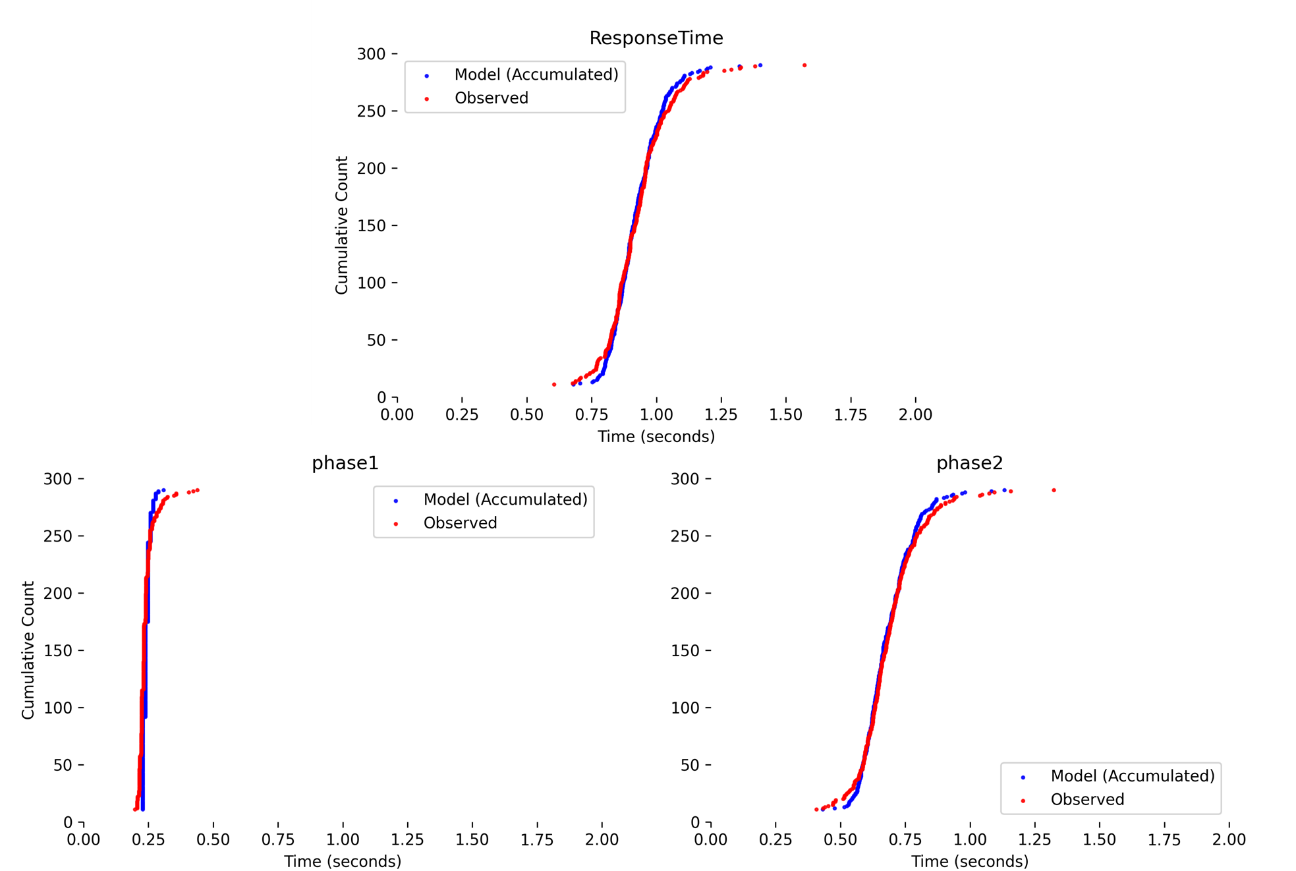


**B. Previous Model Performance vs. Experimental Data (corresponding to Section 5.3)**

- Figure S3. Comparison of previous model simulations and experimental data for Participant 1 (Set 4).


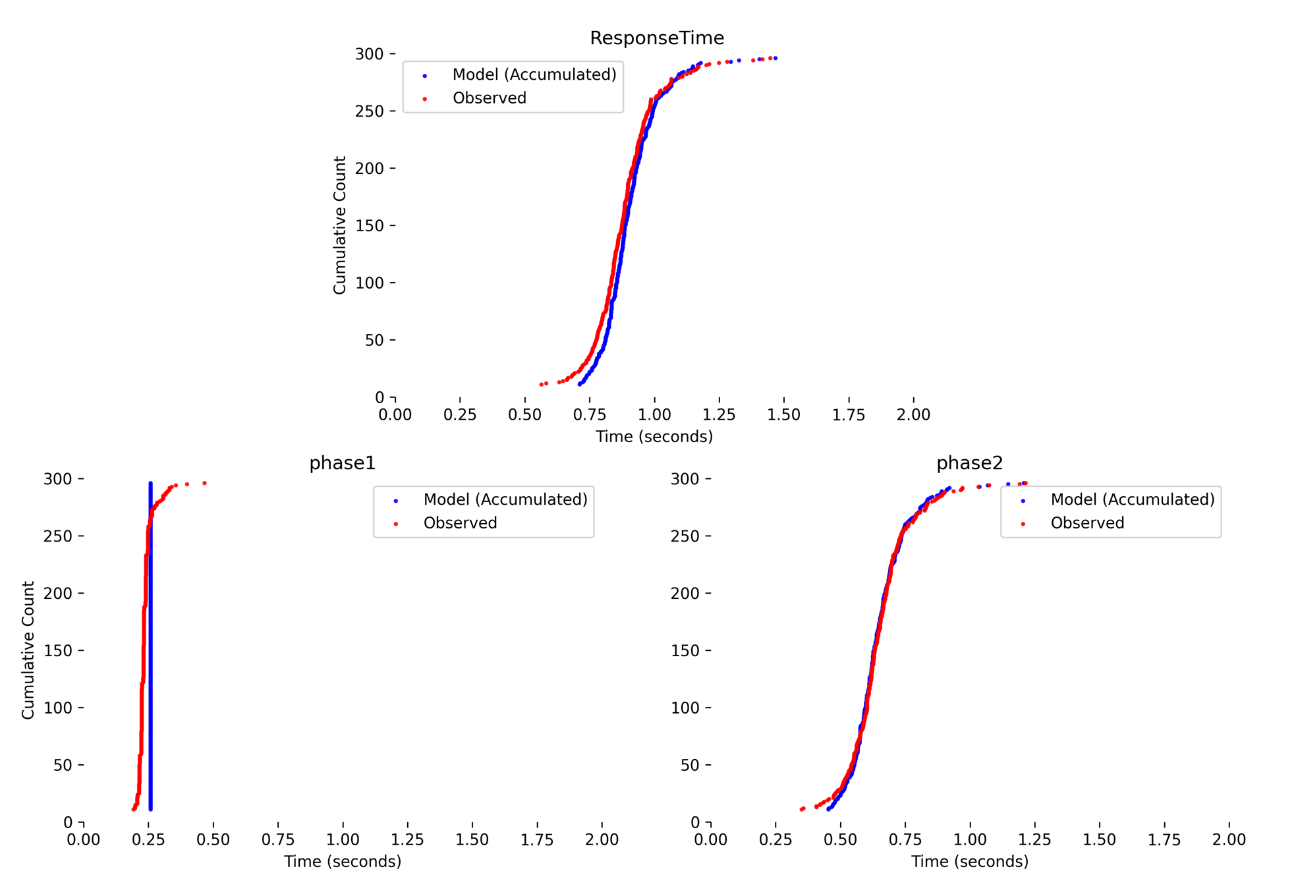


- Figure S4. Comparison of previous model simulations and experimental data for Participant 1 (Set 5).


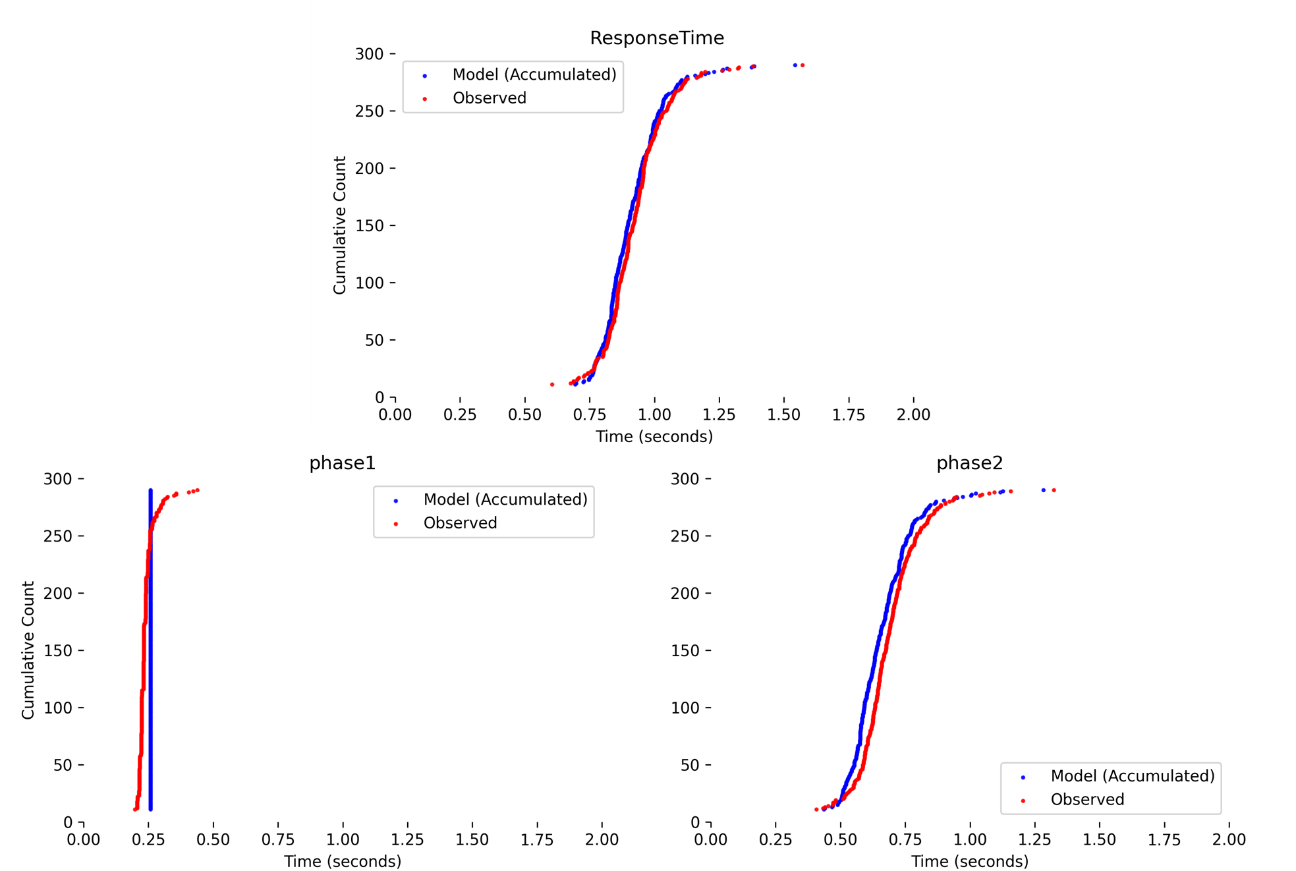


**Participant 2: Results**

**A. Experimental Results (corresponding to Section 5.1)**

- Figure S5. Cumulative response time distributions for Participant 2.


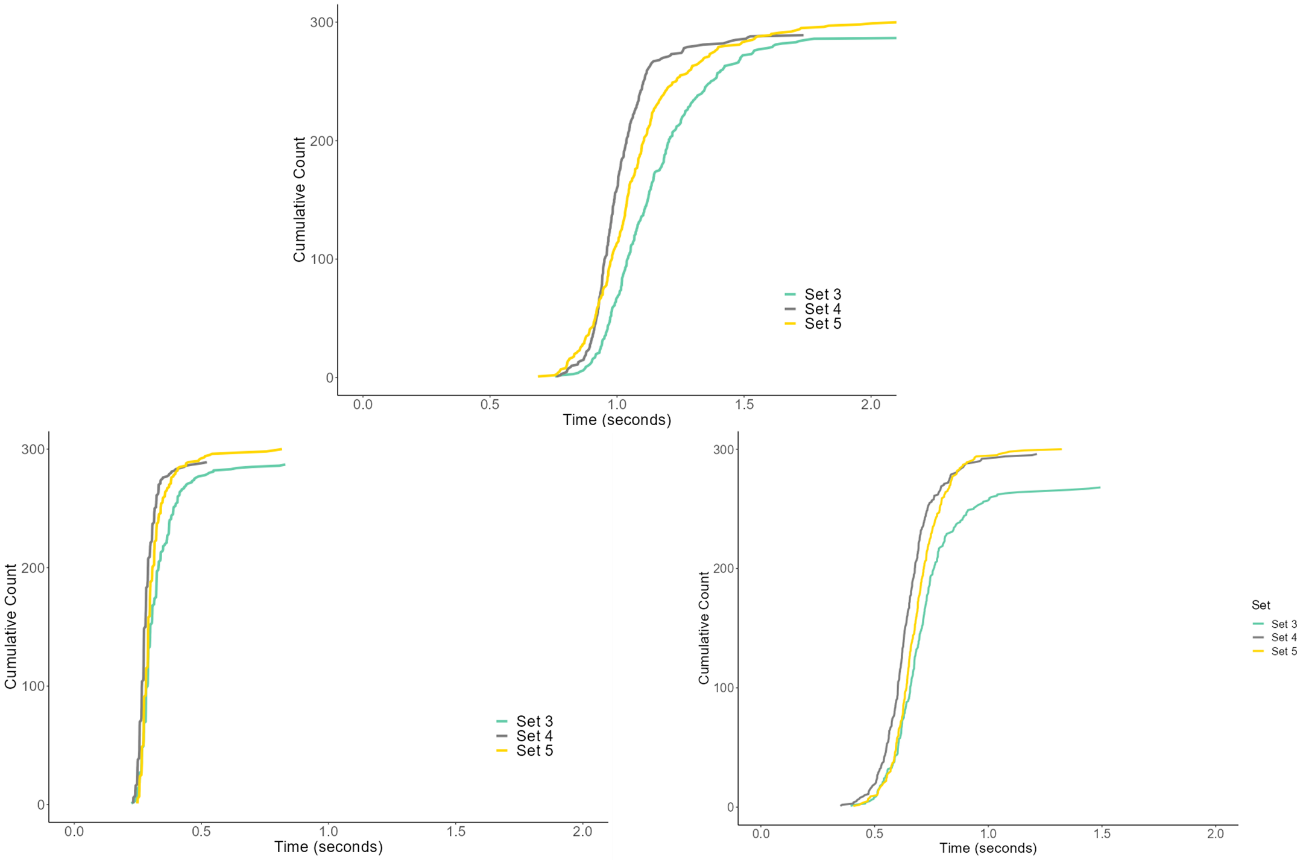


**B. Proposed Model Performance vs. Experimental Data (corresponding to Section 5.2)**

- Figure S6 Comparison of proposed model simulations and experimental data for Participant 2 (Set 3).


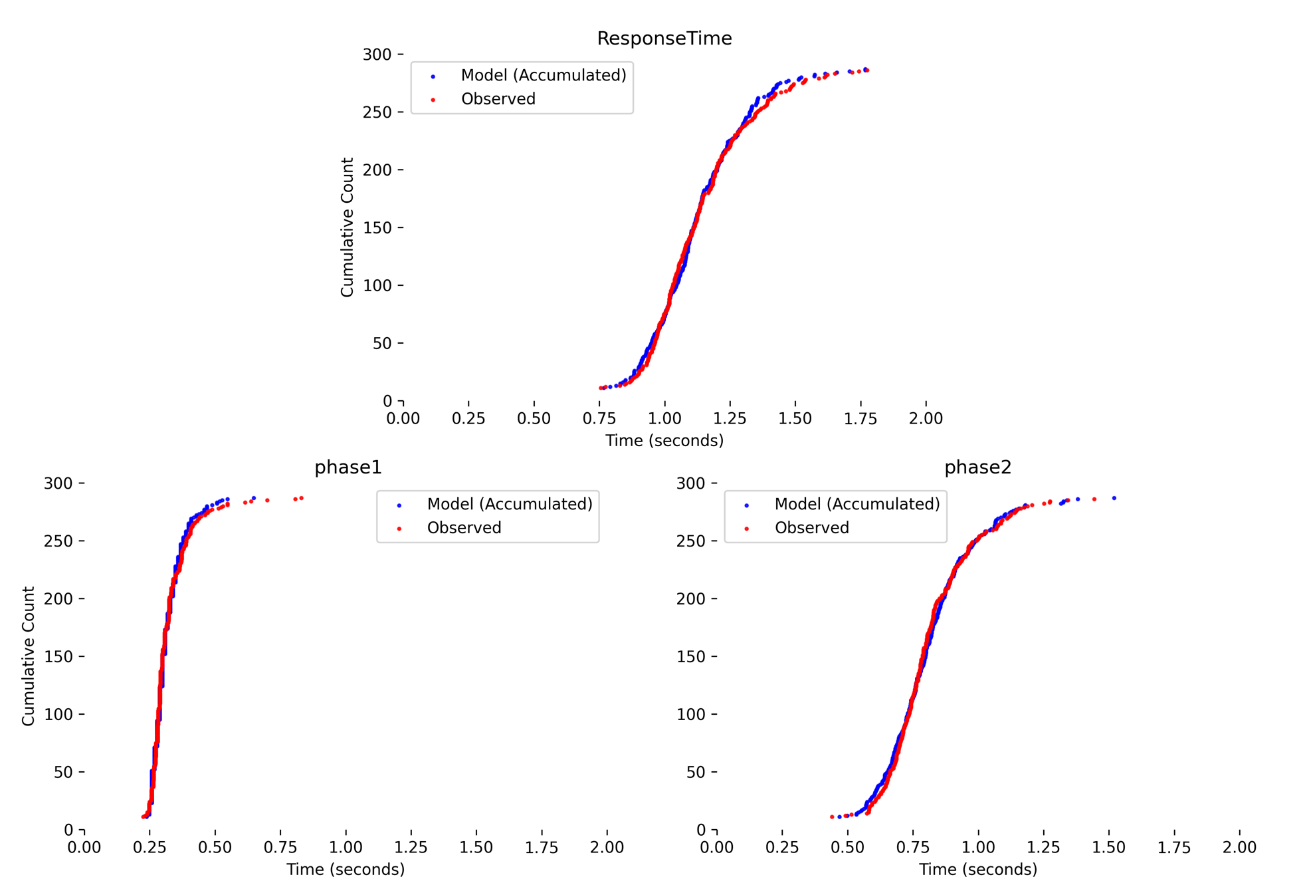


- Figure S7 Comparison of proposed model simulations and experimental data for Participant 2 (Set 4).


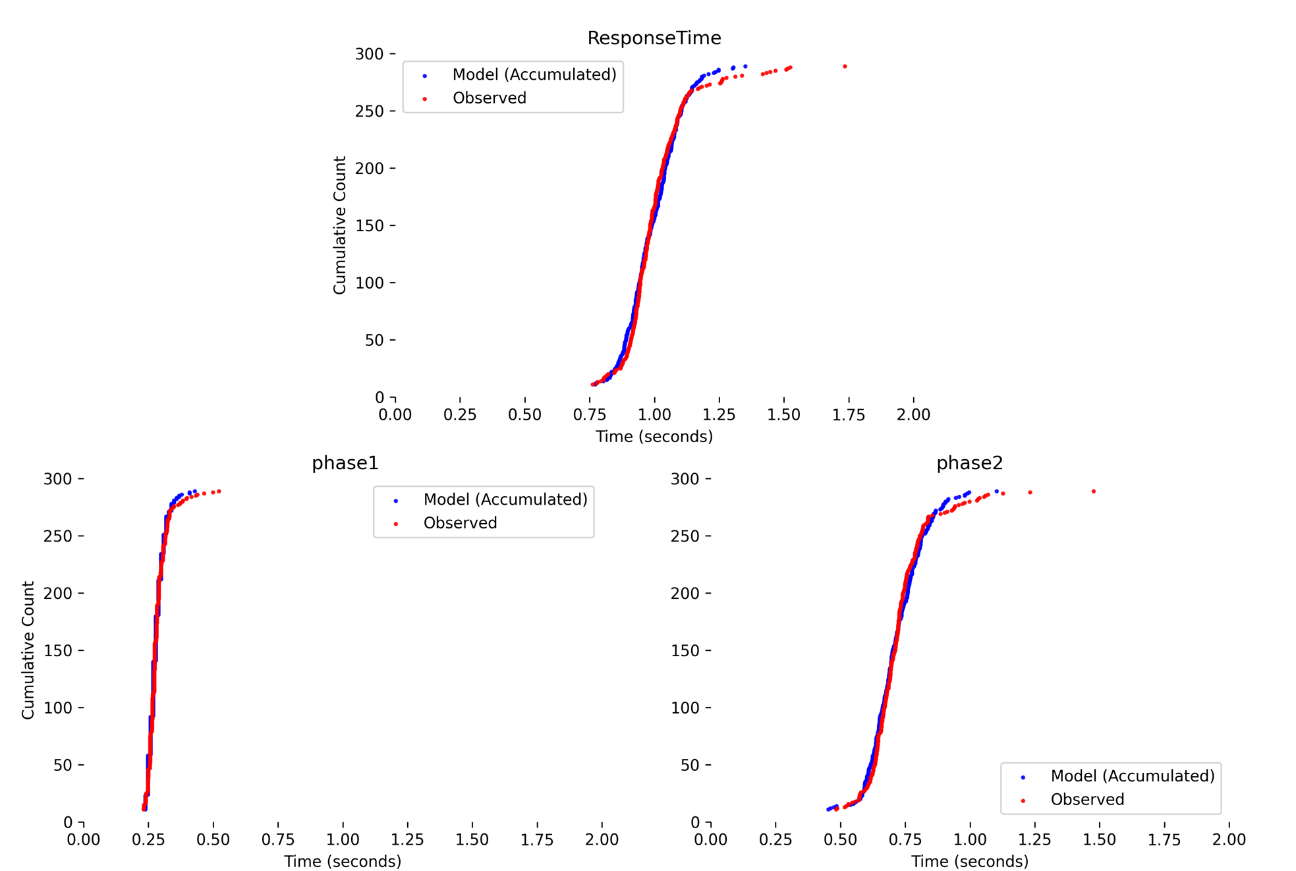


- Figure S8 Comparison of proposed model simulations and experimental data for Participant 2 (Set 5).


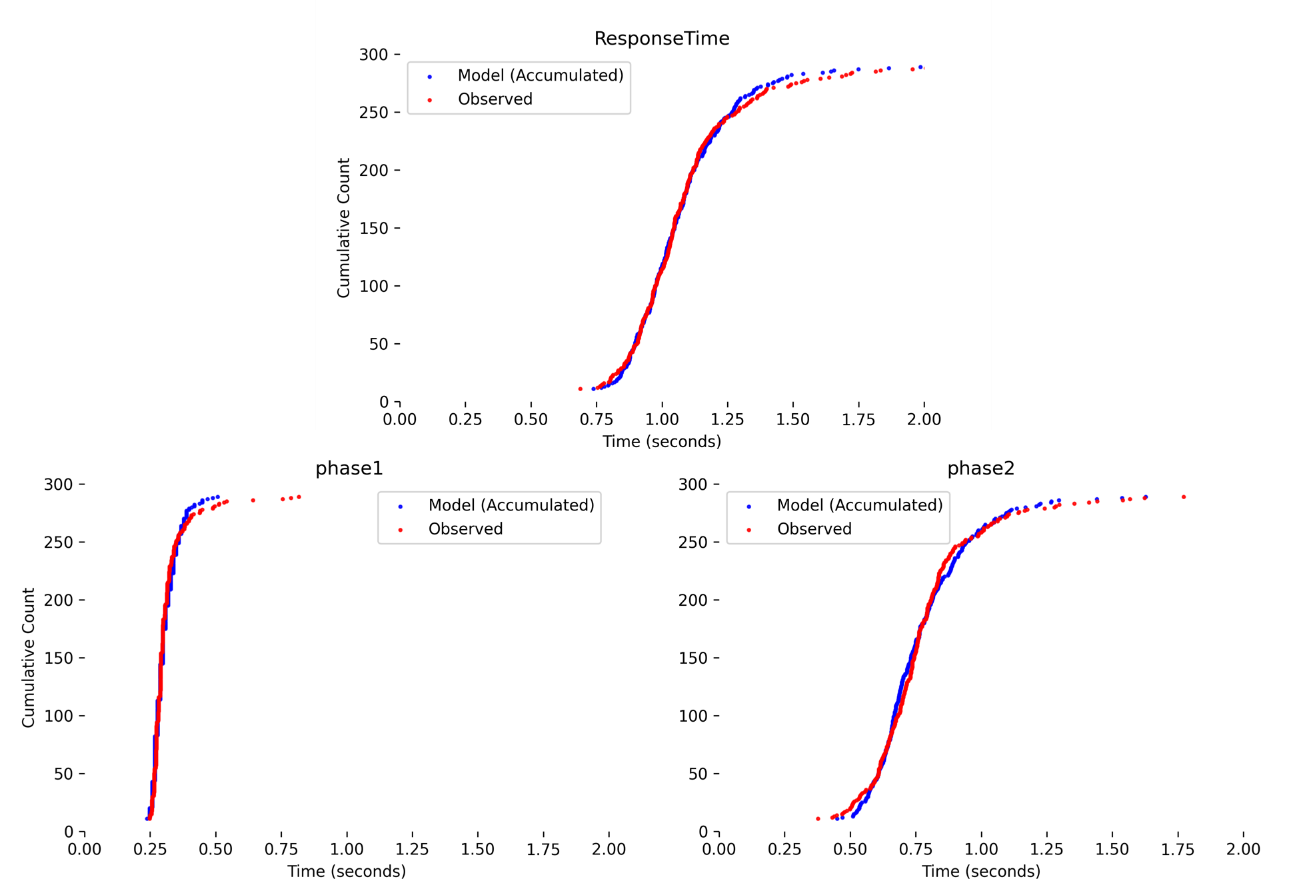


**C. Previous Model Performance vs. Experimental Data (corresponding to Section 5.3)**

- Figure S9 Comparison of previous model simulations and experimental data for Participant 2 (Set 3).


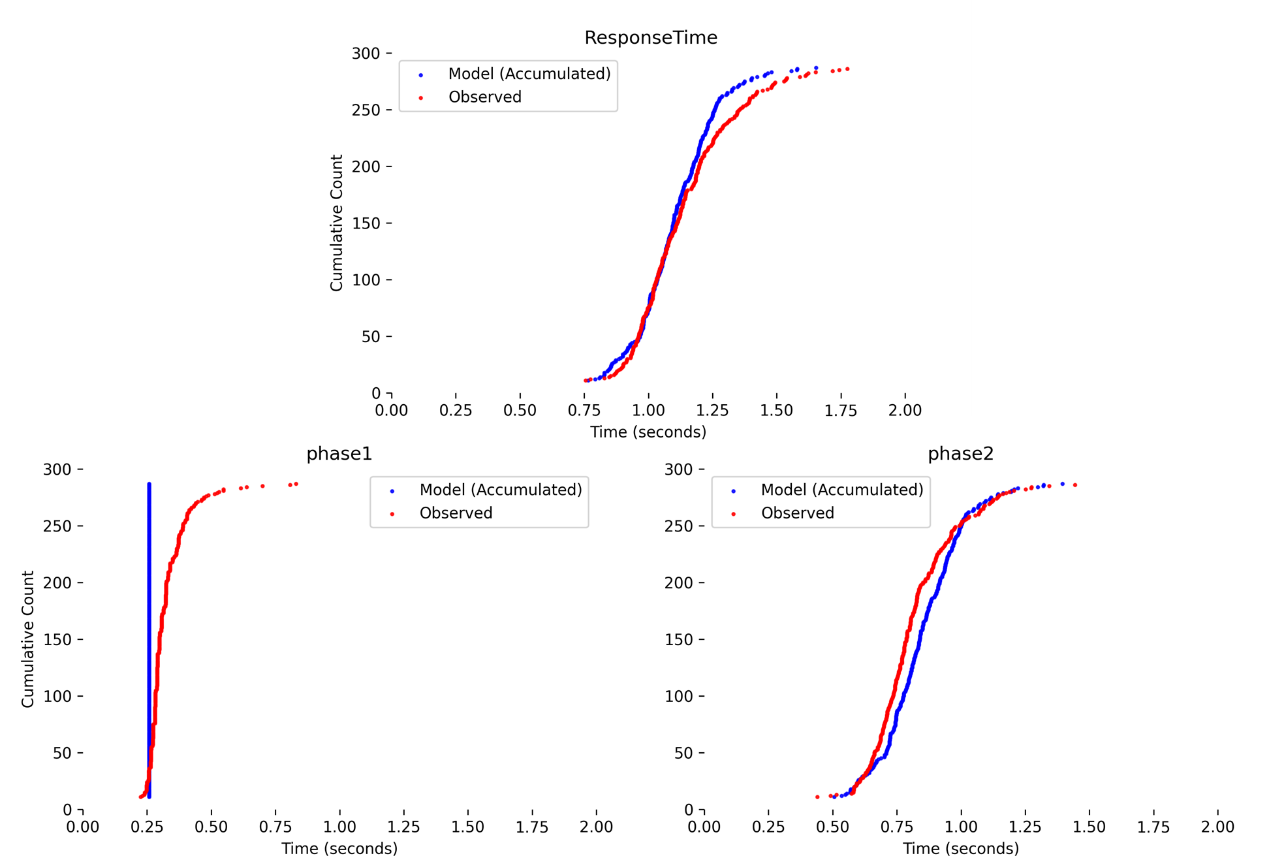


- Figure S10 Comparison of previous model simulations and experimental data for Participant 2 (Set 4).


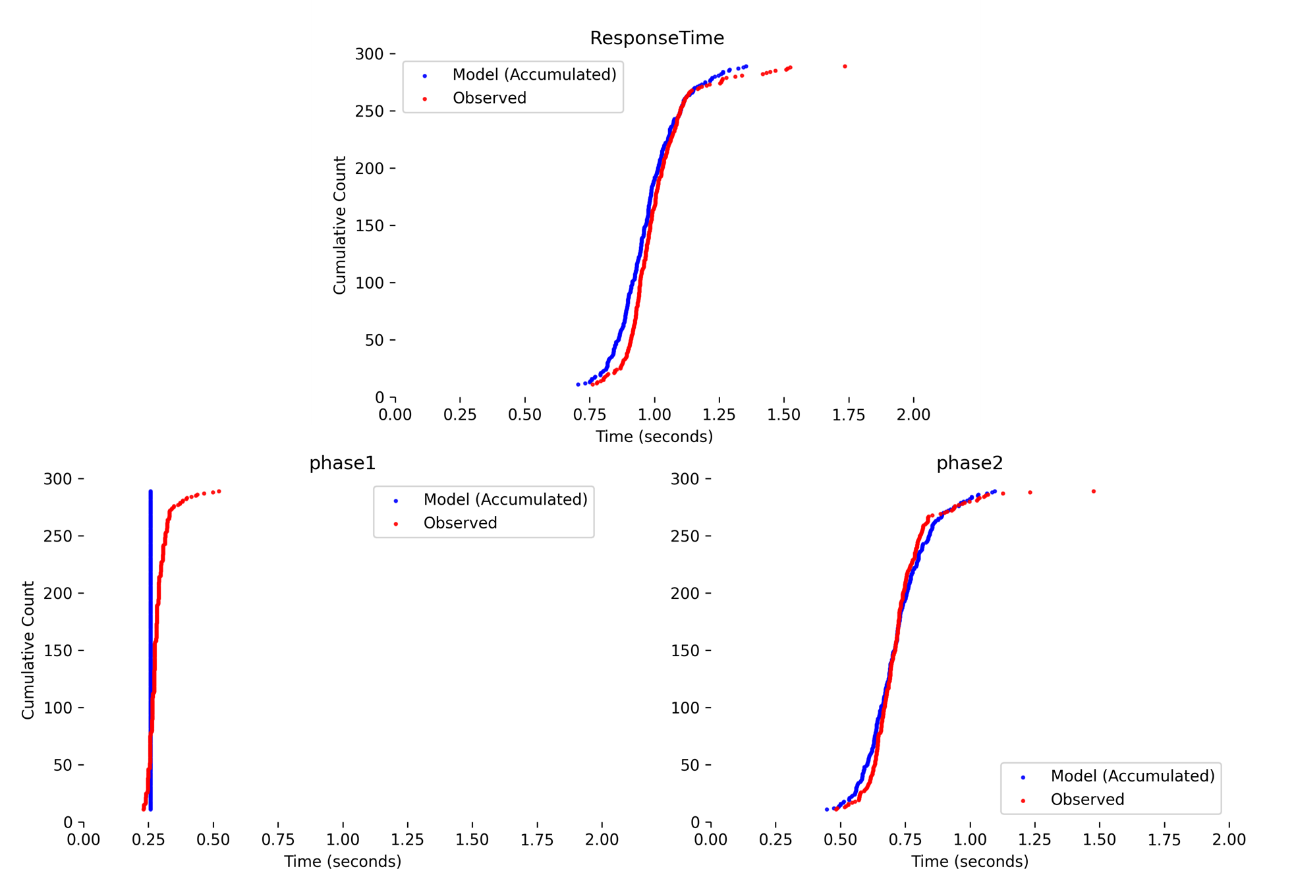


- Figure S11 Comparison of previous model simulations and experimental data for Participant 2 (Set 5).


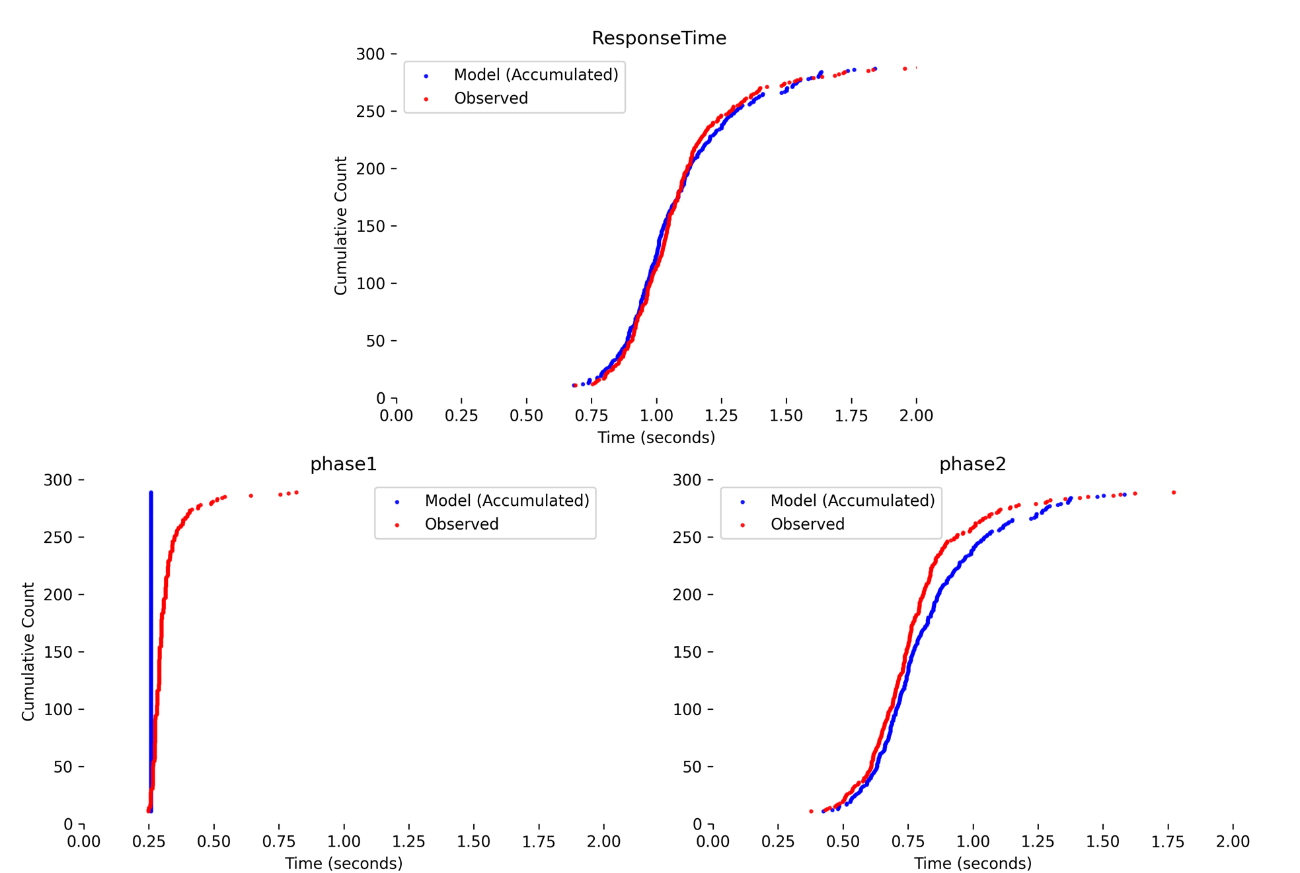


**Participant 3: Results**

**A. Experimental Results (corresponding to Section 5.1)**

- Figure S12. Cumulative response time distributions for Participant 2.


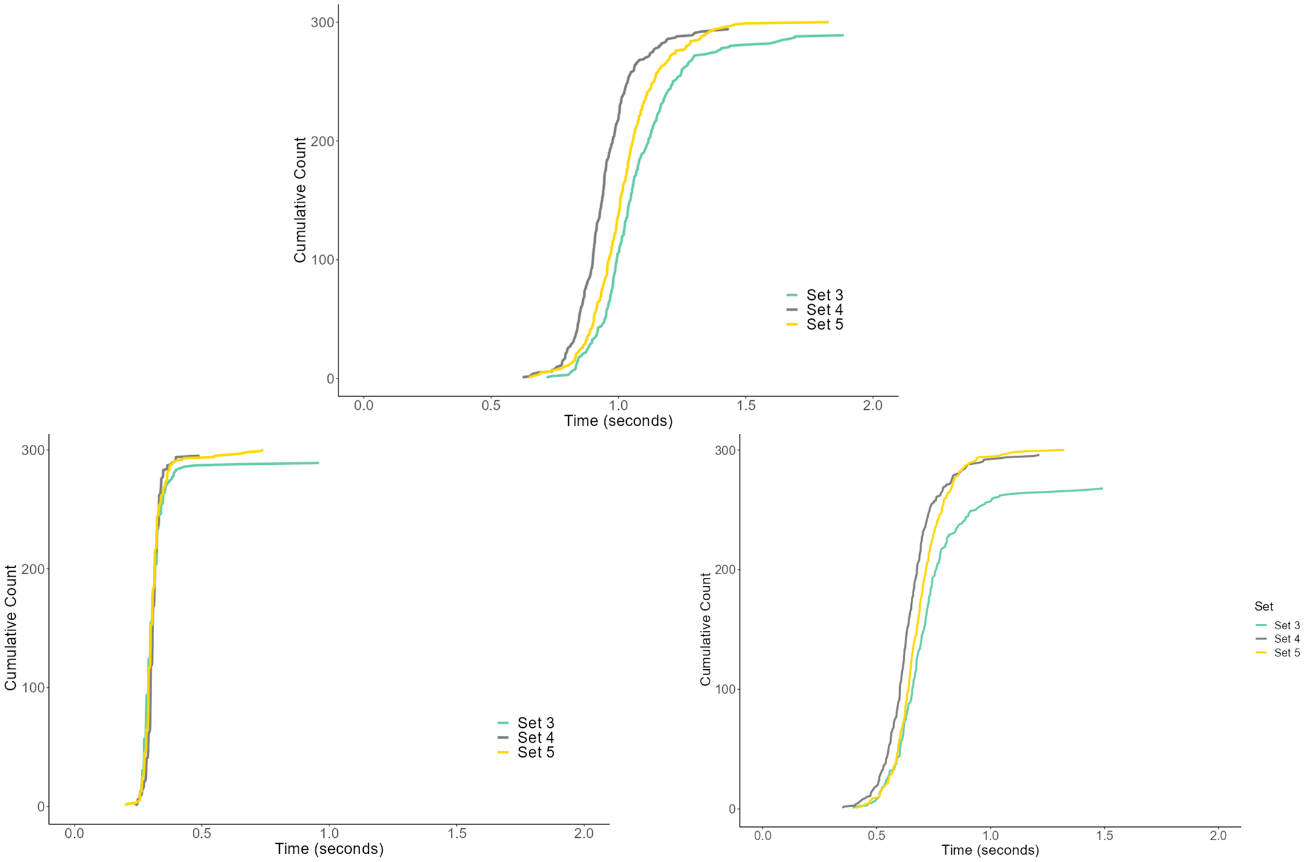


**B. Proposed Model Performance vs. Experimental Data (corresponding to Section 5.2)**

- Figure S13 Comparison of proposed model simulations and experimental data for Participant 2 (Set 3).


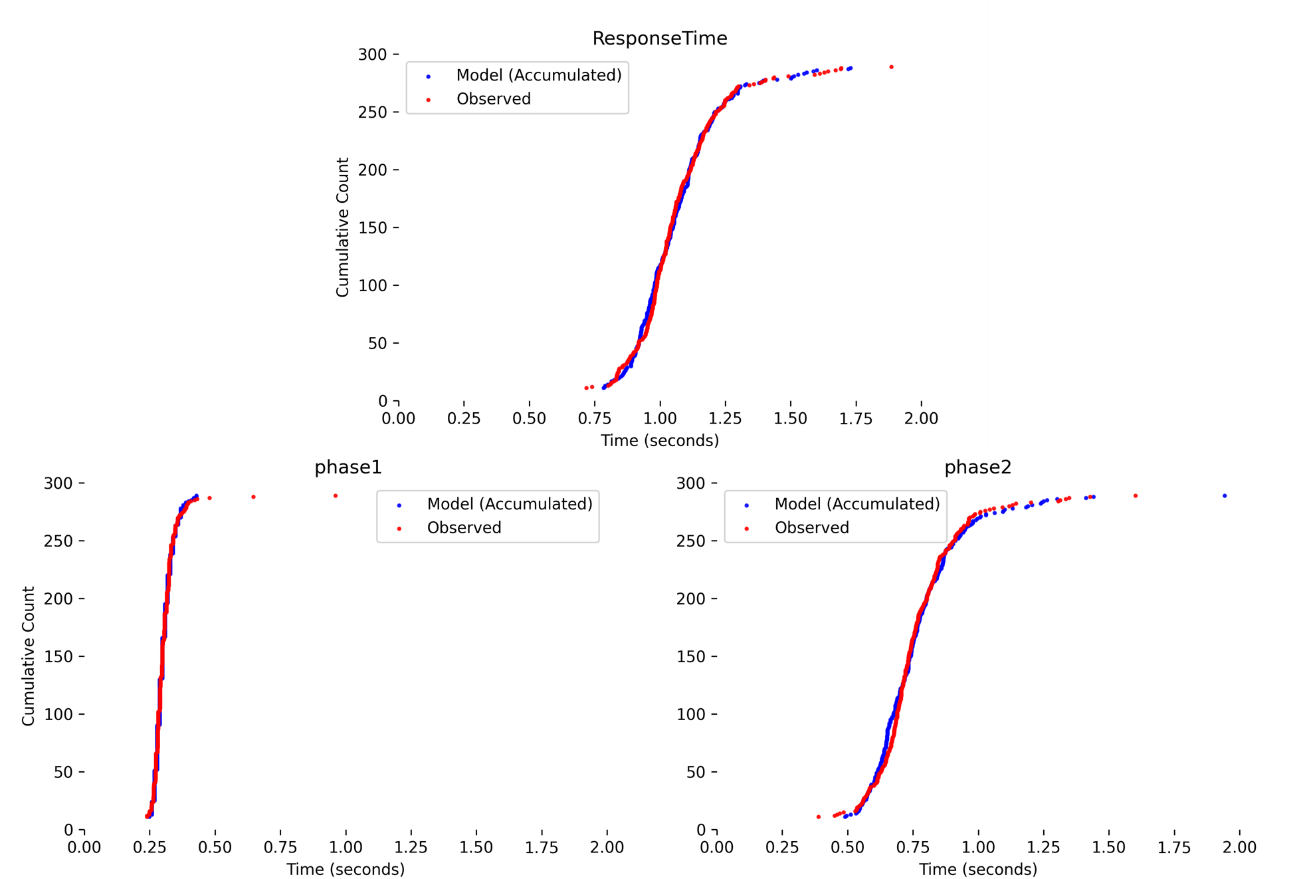


- Figure S14 Comparison of proposed model simulations and experimental data for Participant 2 (Set 4).


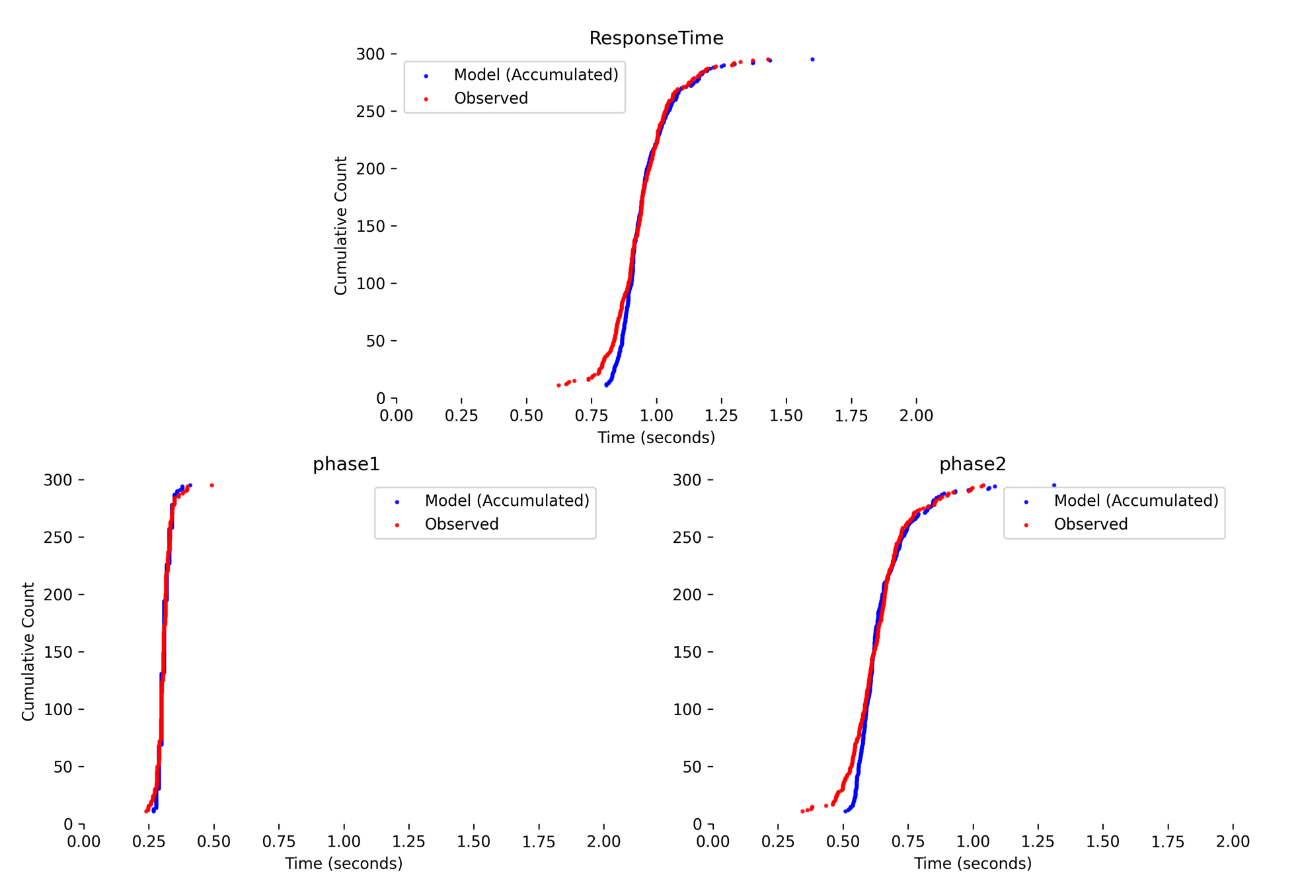


- Figure S15 Comparison of proposed model simulations and experimental data for Participant 2 (Set 5).


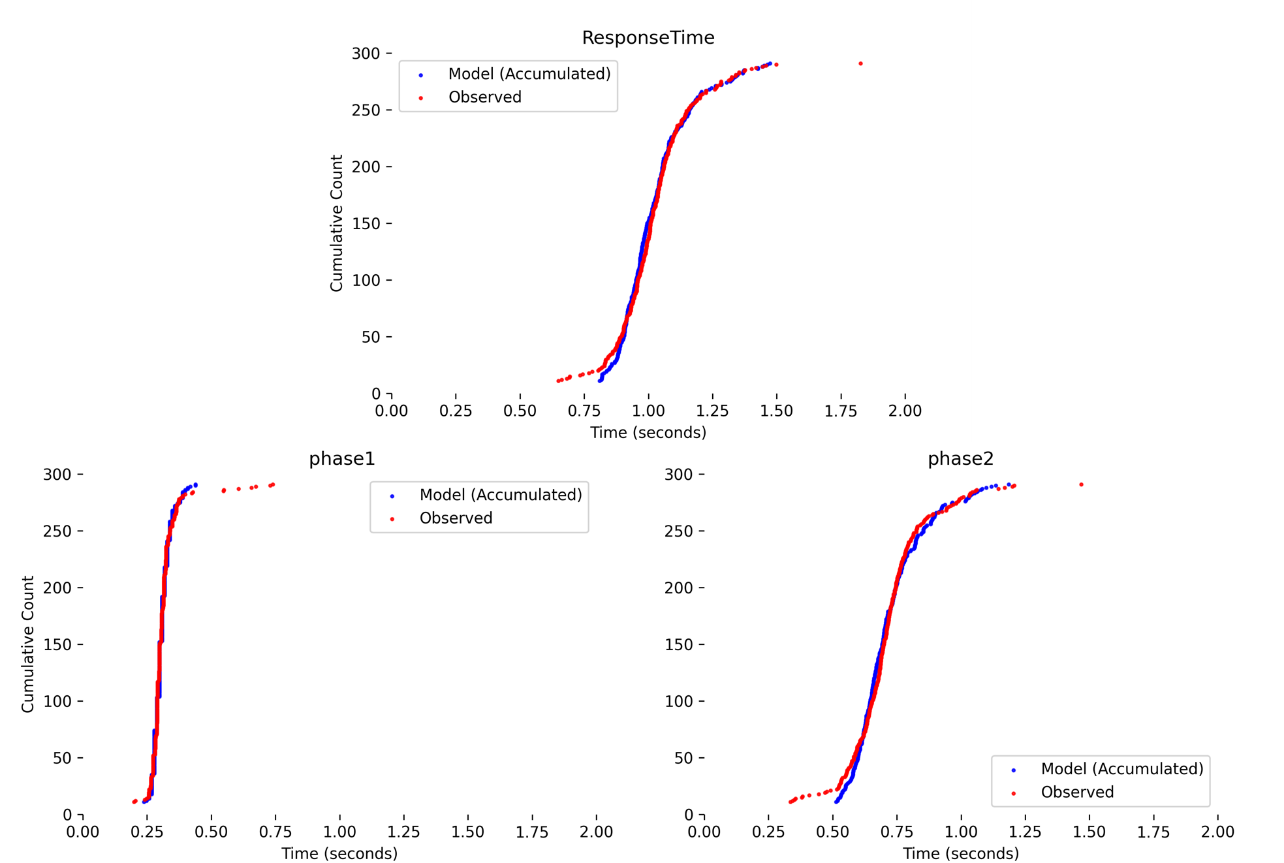


**C. Previous Model Performance vs. Experimental Data (corresponding to Section 5.3)**

- Figure S16 Comparison of previous model simulations and experimental data for Participant 2 (Set 3).


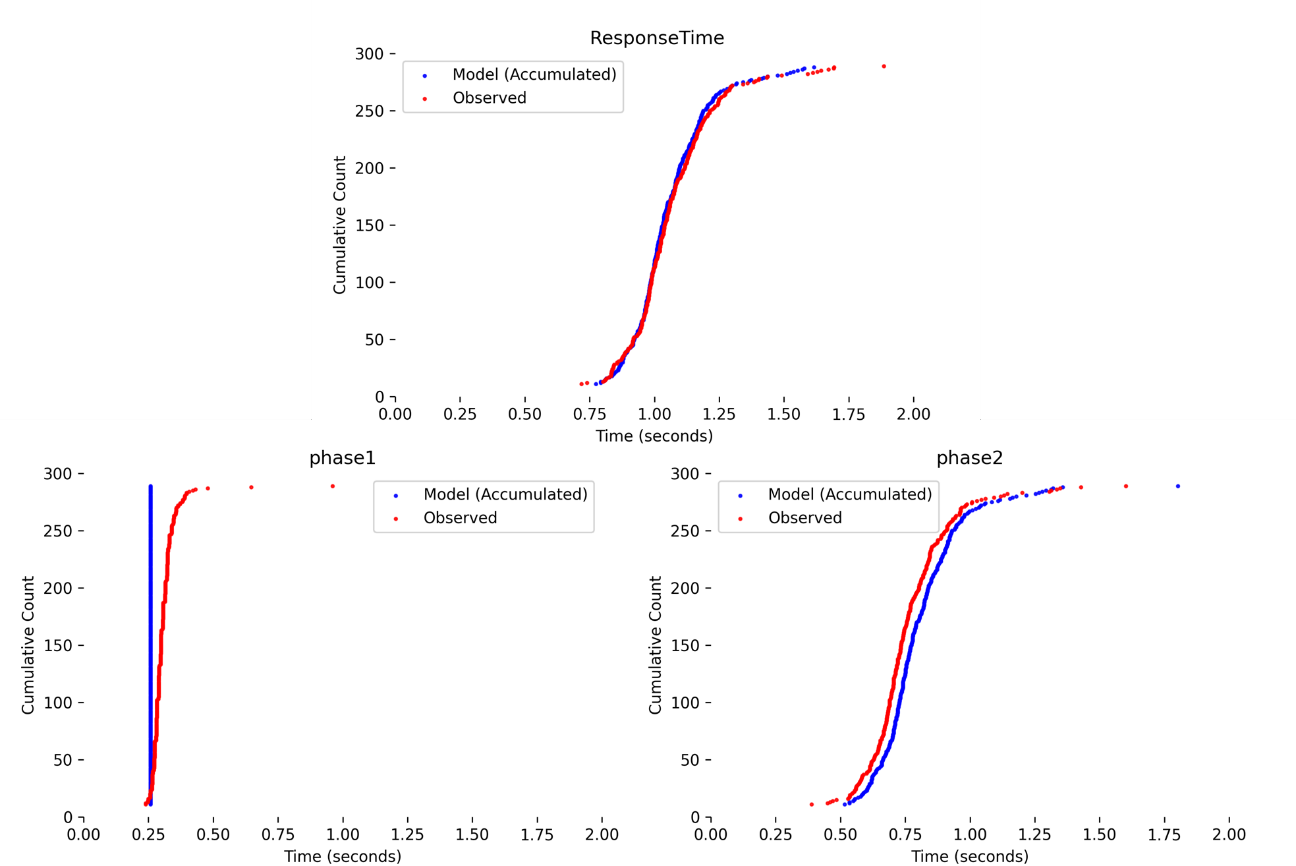


- Figure S17 Comparison of previous model simulations and experimental data for Participant 2 (Set 4).


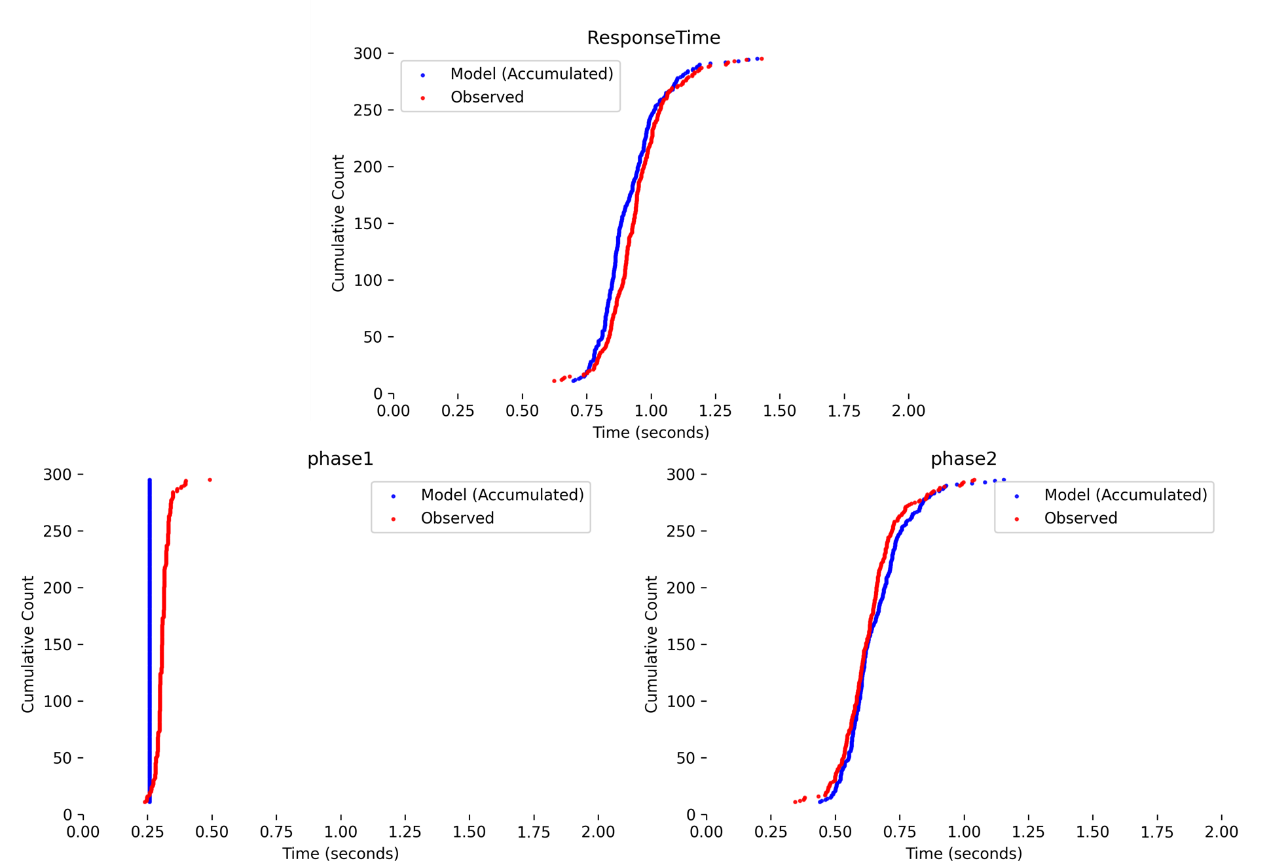


- Figure S18 Comparison of previous model simulations and experimental data for Participant 2 (Set 5).


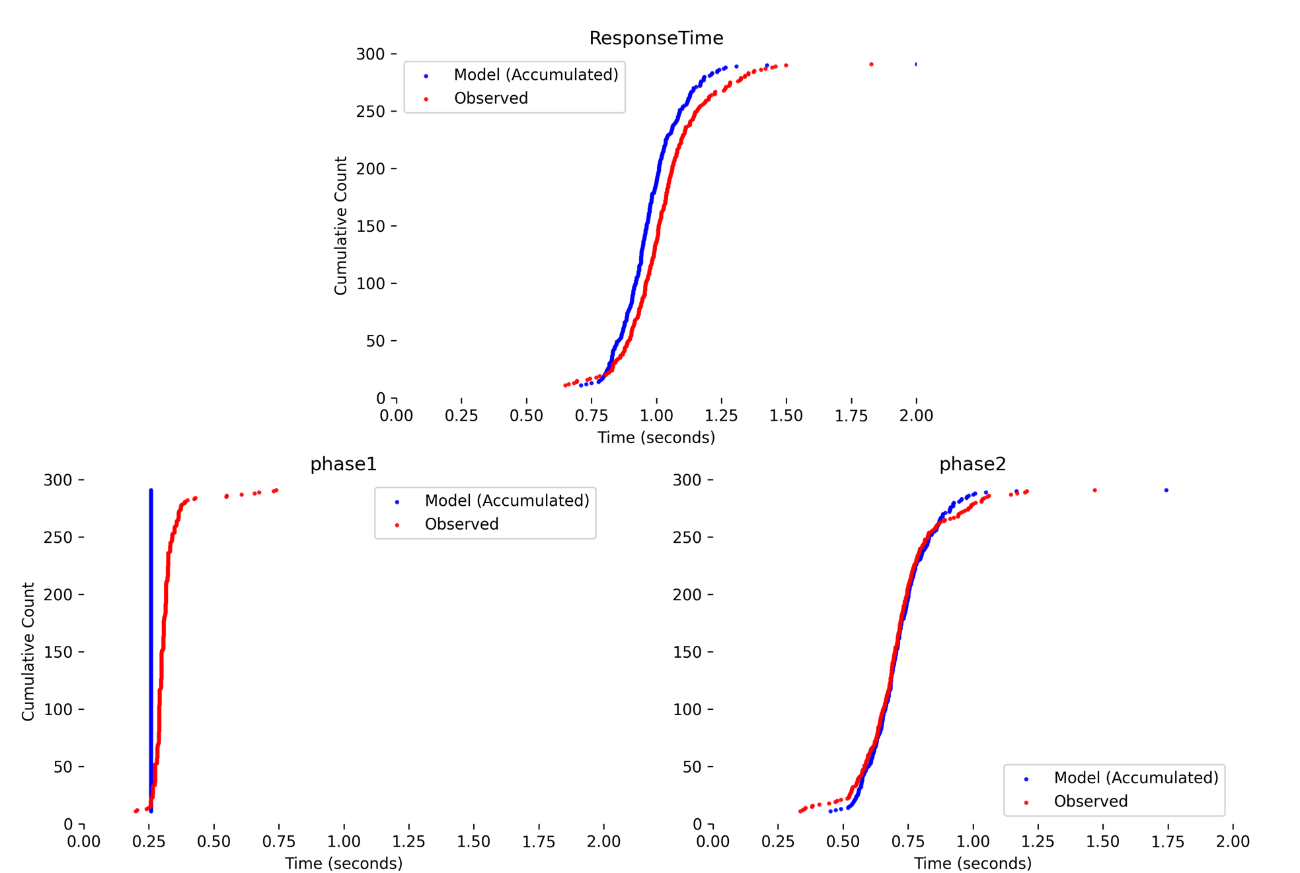


**Participant 4: Results**

**A. Experimental Results (corresponding to Section 5.1)**

- Figure S19. Cumulative response time distributions for Participant 2.


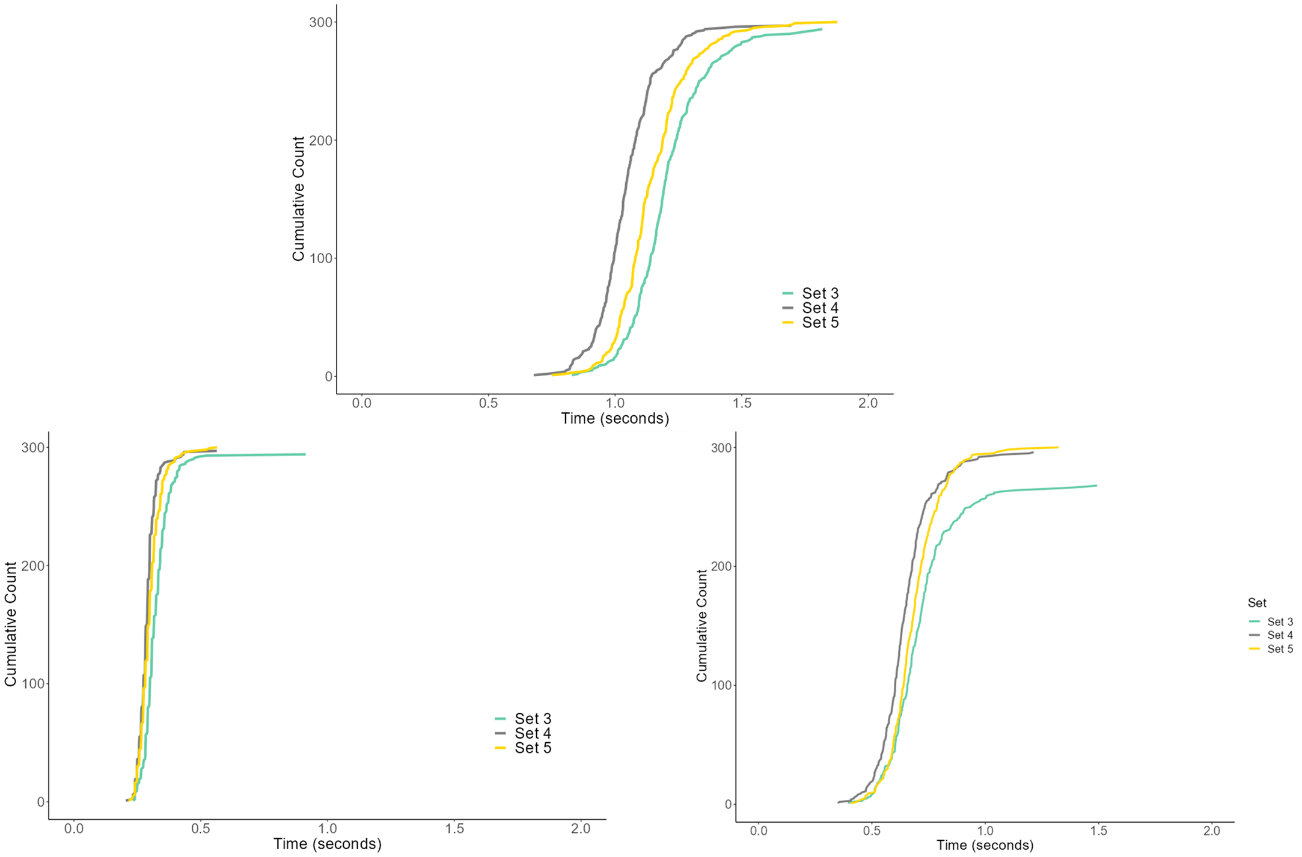


**B. Proposed Model Performance vs. Experimental Data (corresponding to Section 5.2)**

- Figure S20 Comparison of proposed model simulations and experimental data for Participant 2 (Set 3).


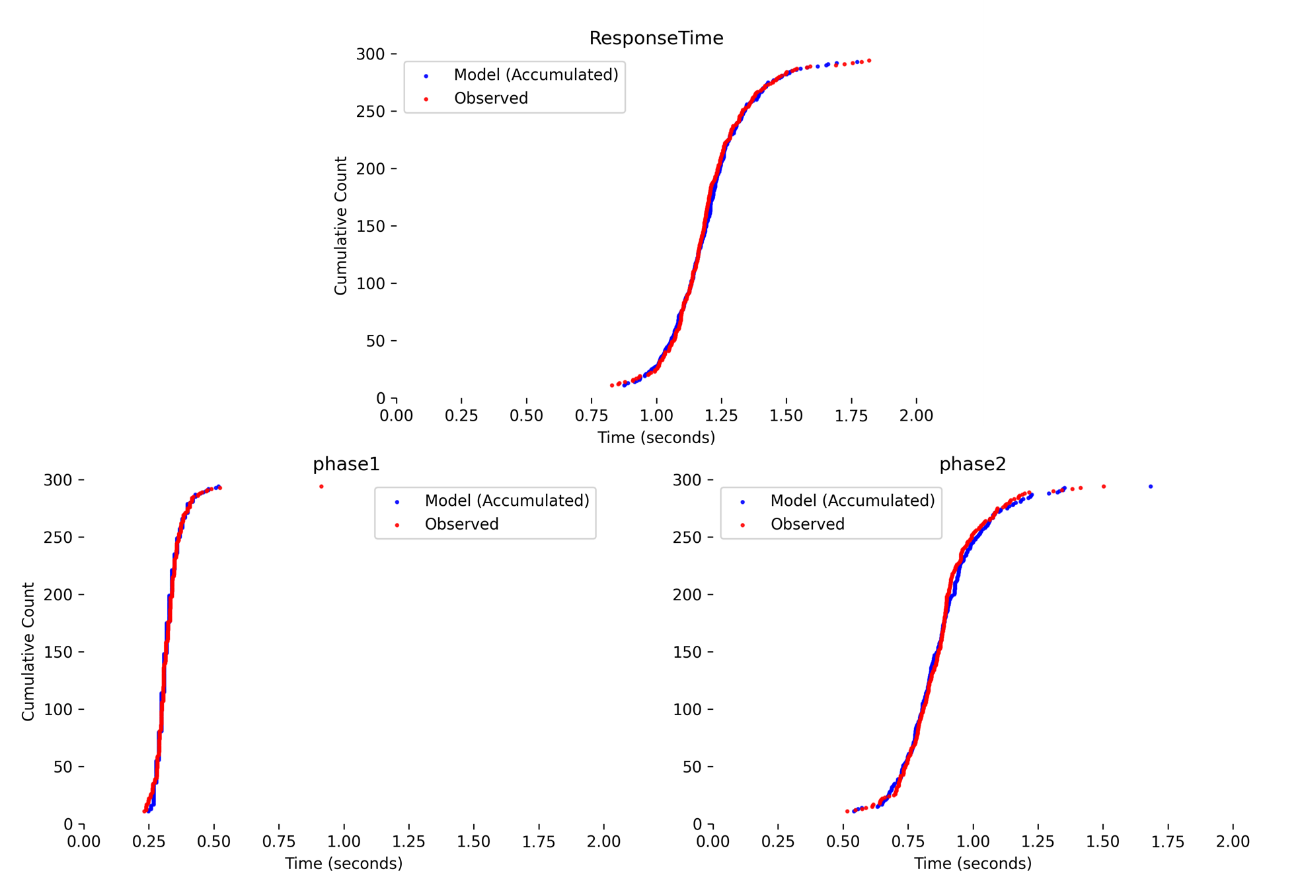


- Figure S21 Comparison of proposed model simulations and experimental data for Participant 2 (Set 4).


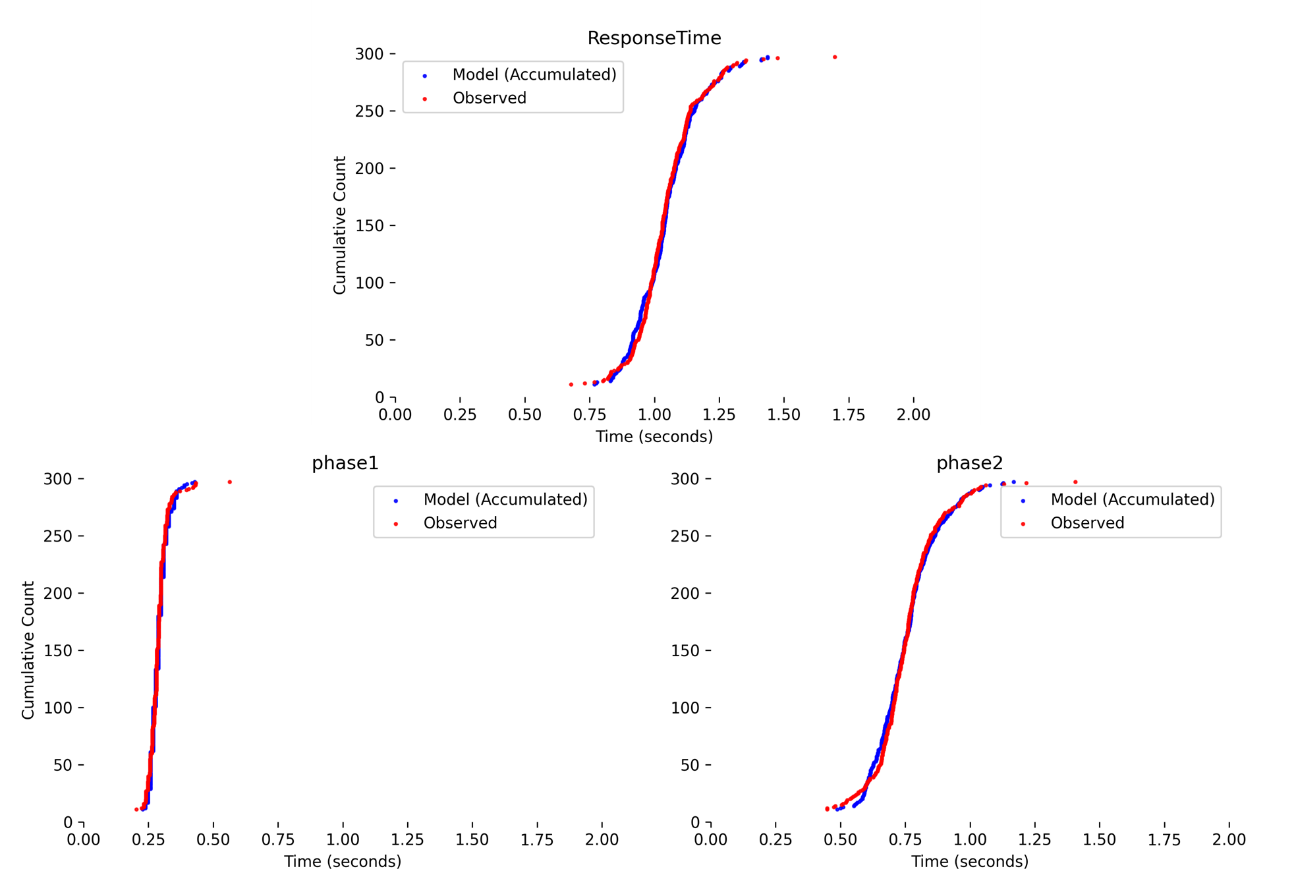


- Figure S22 Comparison of proposed model simulations and experimental data for Participant 2 (Set 5).


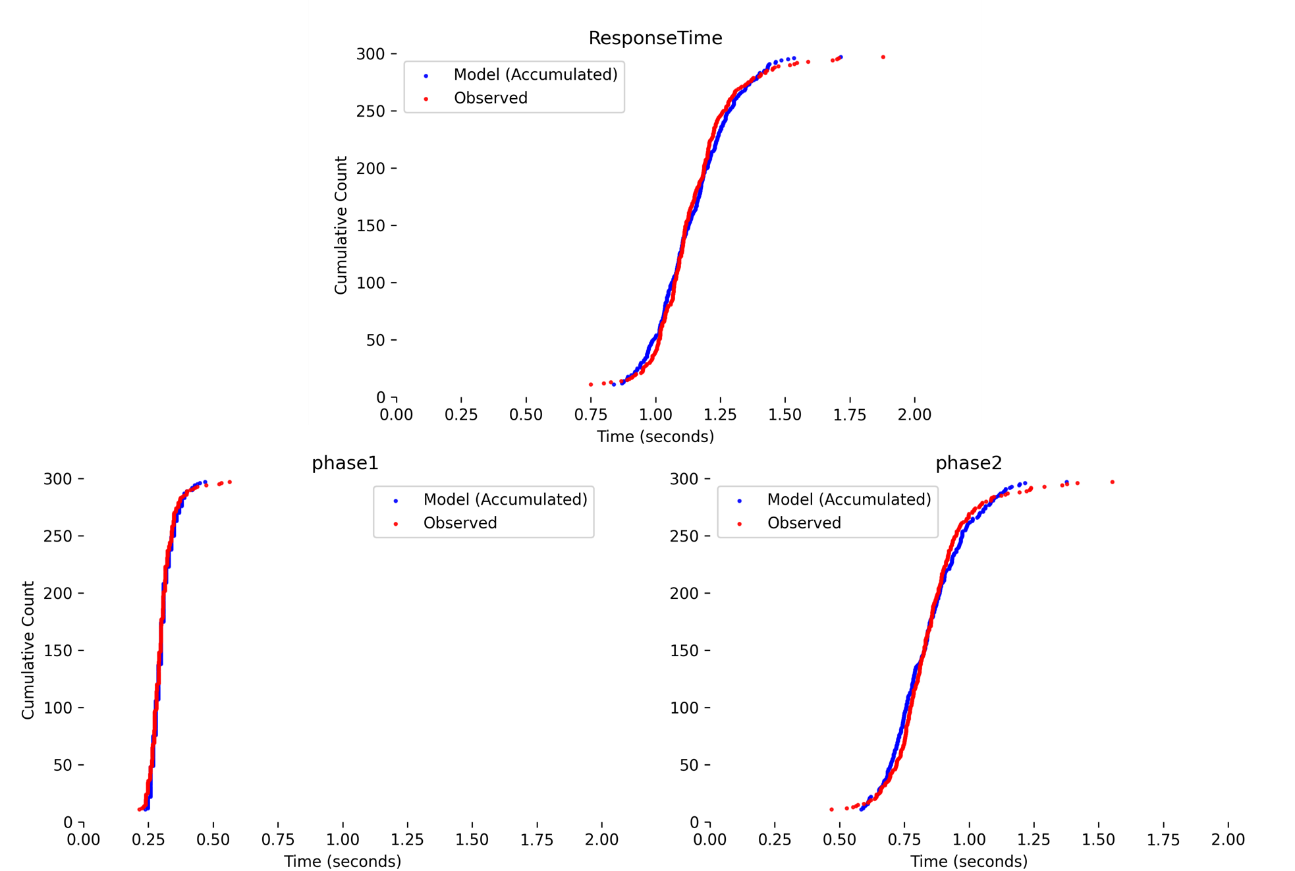


**C. Previous Model Performance vs. Experimental Data (corresponding to Section 5.3)**

- Figure S23 Comparison of previous model simulations and experimental data for Participant 2 (Set 3).


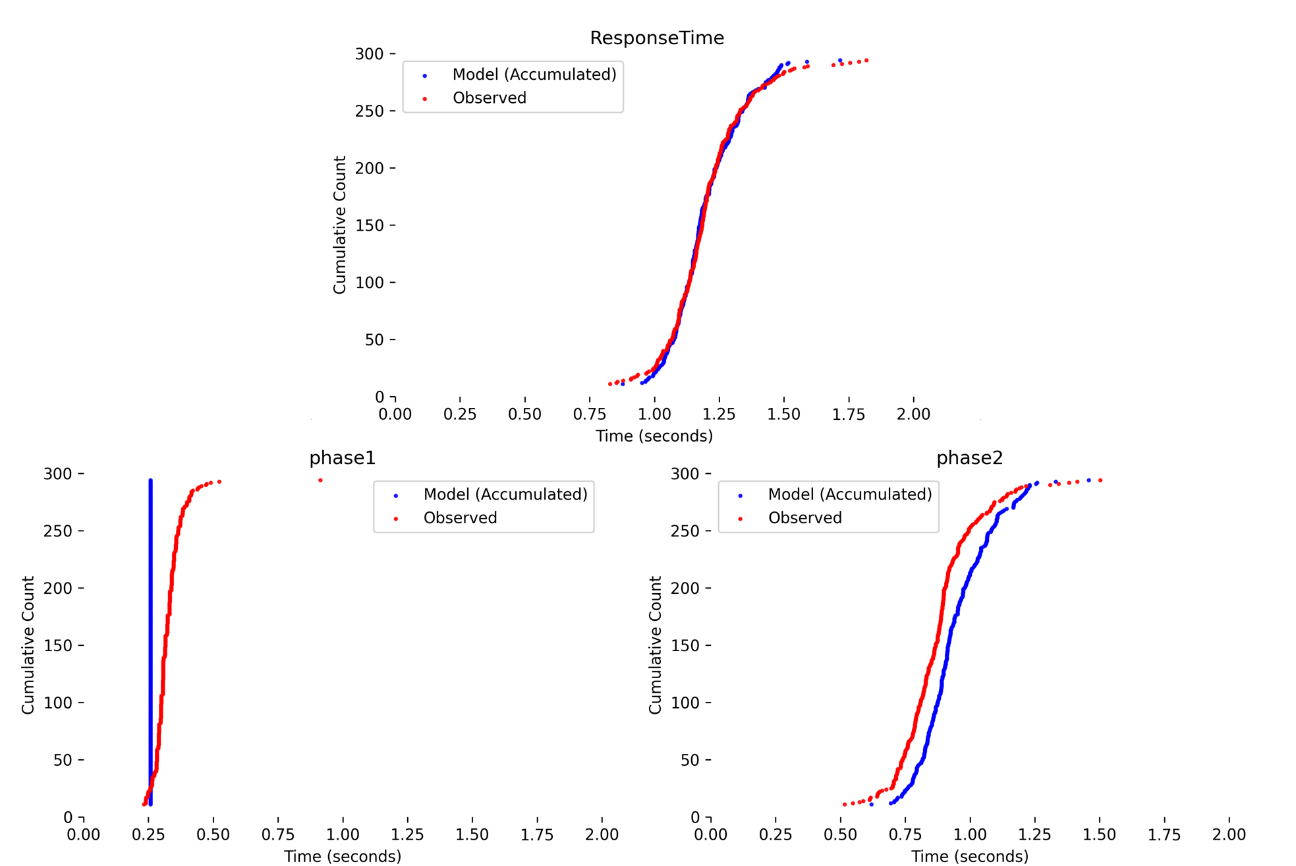


- Figure S24 Comparison of previous model simulations and experimental data for Participant 2 (Set 4).


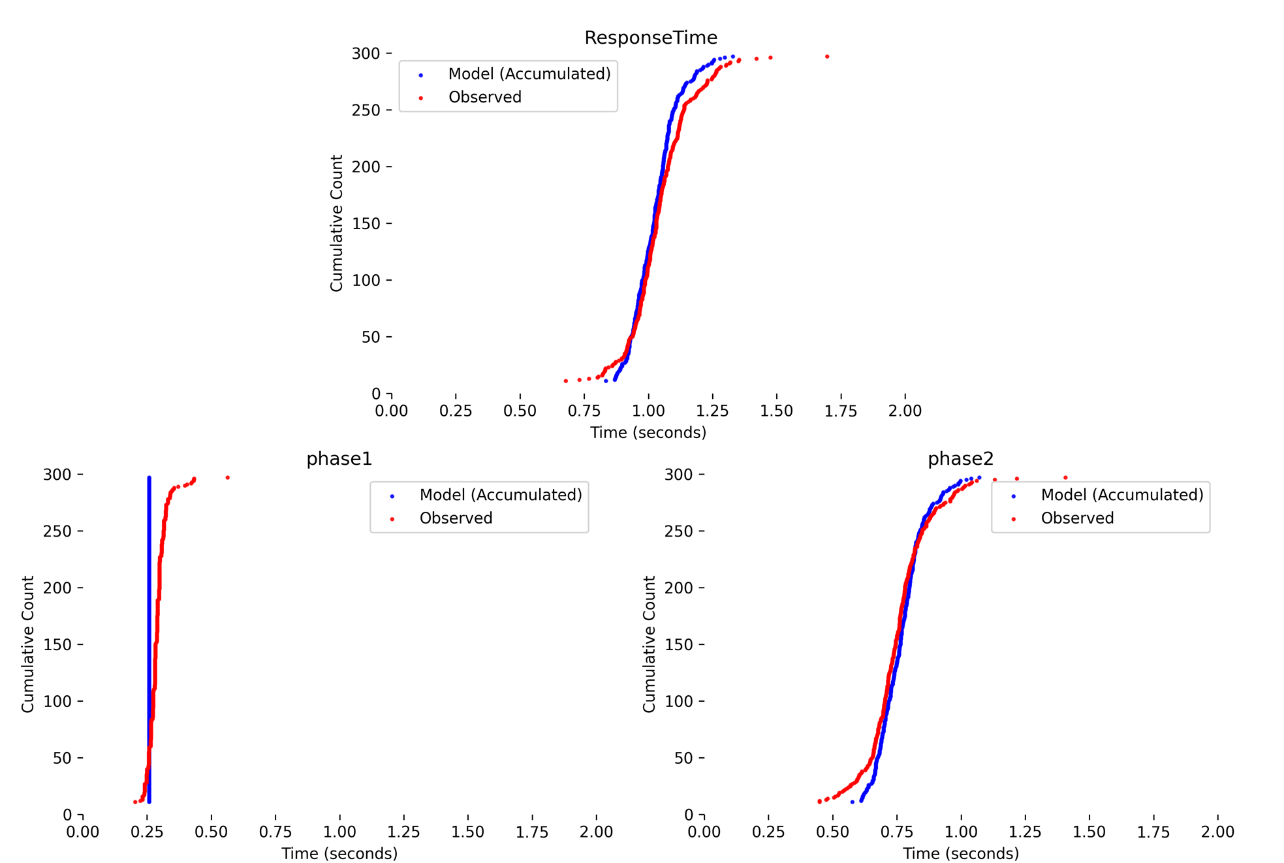


- Figure S25 Comparison of previous model simulations and experimental data for Participant 2 (Set 5).


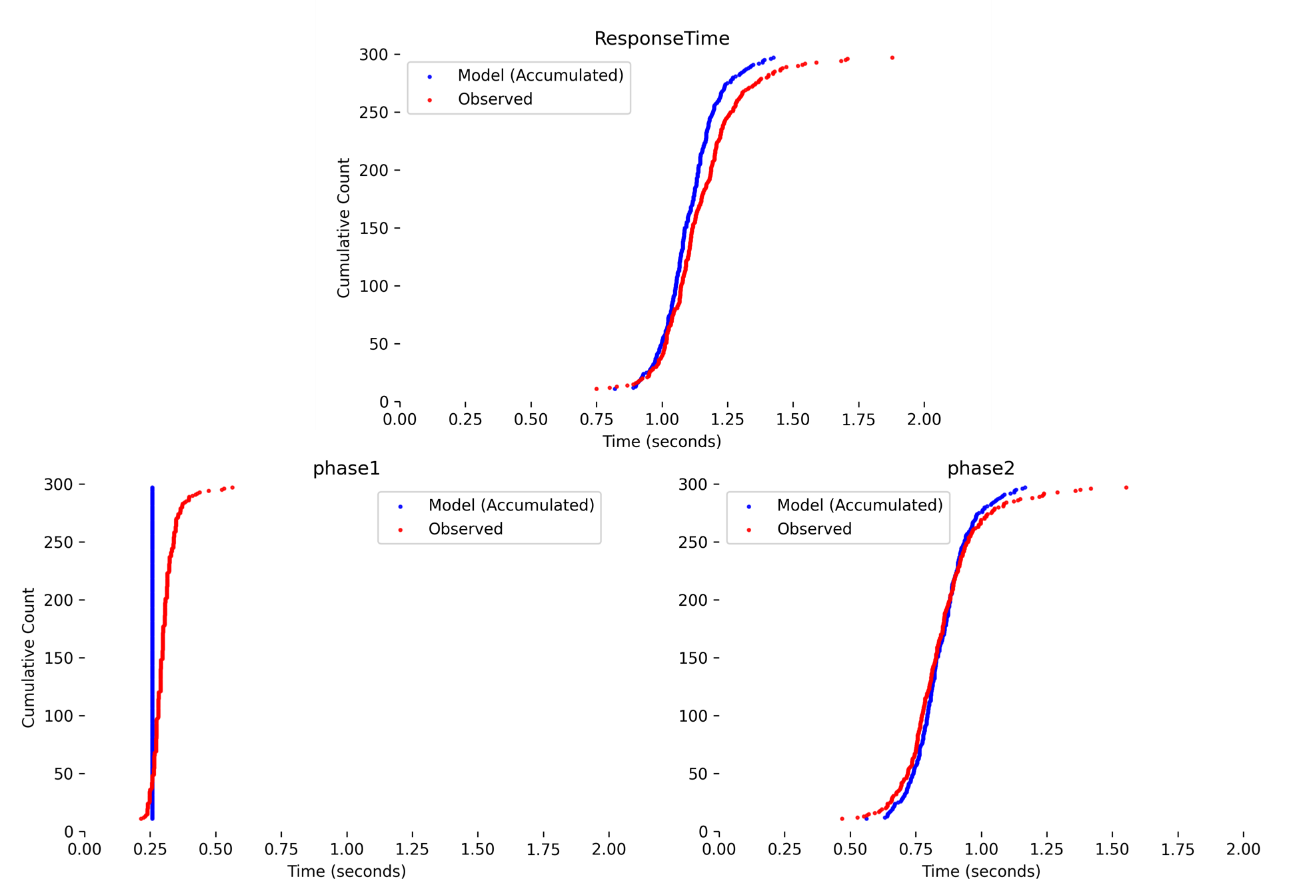

Supplement: Supplementary file 1 [file 6bec6e20ae6301dc744a828c.docx]
